# Supplementary material for: Isolation and Characterization of New Bacteriophages against Staphylococcal Clinical Isolates from Diabetic Foot Ulcers
Source: MDPI journal article supplement (doi:10.3390/v15122287), 2023-11-22

**Table S1.** Genome analysis of the phages SAVM01 to SAVM06.

| Genome statistics | SAVM01  | SAVM02  | SAVM03  | SAVM04  | SAVM05  | SAVM06  |
|-------------------|---------|---------|---------|---------|---------|---------|
| Total Length (bp) | 140,578 | 141,431 | 140,717 | 143,250 | 142,363 | 141,167 |
| No. of Sequences  | 1       | 1       | 1       | 1       | 1       | 1       |
| GC Content (%)    | 30.4    | 30.4    | 30.4    | 30.2    | 30.4    | 30.4    |
| N50               | 140,578 | 141,431 | 140,717 | 143,250 | 142,363 | 141,167 |
| Gap Ratio (%)     | 0.0     | 0.0     | 0.0     | 0.0     | 0.0     | 0.0     |
| No. of CDSs       | 215     | 218     | 217     | 220     | 221     | 221     |
| No. of rRNA       | 0       | 0       | 0       | 0       | 0       | 0       |
| No. of tRNA       | 4       | 4       | 4       | 4       | 3       | 3       |
| No. of CRISPRS    | 0       | 0       | 0       | 0       | 0       | 0       |
| Coding Ratio (%)  | 89.1    | 89.9    | 90.3    | 91.1    | 90.1    | 90.0    |

**Table S2.** Single nucleotide polymorphism (SNP) distance based on whole genome analysis.

| SNP distance | SAVM01 | SAVM02 | SAVM03 | SAVM04 | SAVM05 | SAVM06 |
|--------------|--------|--------|--------|--------|--------|--------|
| SAVM01       | 0      | 6370   | 0      | 8616   | 6361   | 10,248 |
| SAVM02       | 6,370  | 0      | 6370   | 11,008 | 9174   | 7777   |
| SAVM03       | 0      | 6370   | 0      | 8616   | 6361   | 10248  |
| SAVM04       | 8616   | 11,008 | 8616   | 0      | 9766   | 12499  |
| SAVM05       | 6361   | 9174   | 6361   | 9766   | 0      | 8720   |
| SAVM06       | 10,248 | 7777   | 10248  | 12499  | 8720   | 0      |

**Table S3.** Identification of bacterial mutations by whole-genome sequencing analysis of phage-resistant *S. aureus* NSA1385 mutants.

| Phage to which mutant are resistant | Position | Reference  | Mutation   | Annotation                                                           | Protein alteration                                                             |
|-------------------------------------|----------|------------|------------|----------------------------------------------------------------------|--------------------------------------------------------------------------------|
| SAVM01                              | 1649353  | A          | AT         | <i>recJ</i> gene<br>Single-stranded-DNA-specific exonuclease<br>RecJ | Tyrosine → Isoleucine<br>Codon stop shift → protein extension (35 Aa → 758 Aa) |
|                                     | 1928613  | A          | G          | Glucosaminidase domain-containing protein                            | Alanine → Threonine<br>Asparagine → Histidine                                  |
|                                     | 1928619  | AGCATT     | TGTATG     |                                                                      |                                                                                |
|                                     | 2065350  | A          | G          | Putative HNHc nuclease                                               |                                                                                |
|                                     | 2071806  | T          | C          | <i>lexA_4</i> gene<br>LexA repressor                                 | Threonine → Alanine                                                            |
|                                     | 2071836  | ATAT       | GTAC       |                                                                      |                                                                                |
|                                     | 2071845  | C          | T          |                                                                      |                                                                                |
|                                     | 2071851  | GCAT       | ACAC       |                                                                      |                                                                                |
|                                     | 2071869  | T          | C          |                                                                      |                                                                                |
|                                     | 2071878  | CGAAA      | TGAAG      |                                                                      |                                                                                |
|                                     | 2071905  | T          | C          |                                                                      |                                                                                |
|                                     | 2071912  | G          | A          |                                                                      | Valine → Isoleucine                                                            |
|                                     | 2071917  | TGGT       | CGGC       |                                                                      |                                                                                |
|                                     | 2071944  | A          | G          |                                                                      |                                                                                |
| SAVM02                              | 292849   | T          | C          | <i>essG_4</i> gene<br>TIGR01741 family protein                       | Serine → Arginine                                                              |
|                                     | 292858   | C          | T          |                                                                      |                                                                                |
|                                     | 292867   | C          | A          |                                                                      |                                                                                |
|                                     | 292900   | A          | T          |                                                                      |                                                                                |
|                                     | 1494182  | C          | T          | DUF1381 domain-containing protein                                    |                                                                                |
|                                     | 1507177  | A          | T          | <i>xerC_2</i> gene<br>Site-specific recombinase XerC                 | Isoleucine → Phenylalanine                                                     |
|                                     | 1507194  | CAAAAATAAC | TAAGAACAAT |                                                                      |                                                                                |
|                                     | 1507209  | TAAATAC    | GAAGTAT    |                                                                      |                                                                                |
|                                     | 1649353  | A          | AT         | <i>recJ</i> gene<br>Single-stranded-DNA-specific exonuclease<br>RecJ | Tyrosine → Isoleucine<br>Codon stop shift → protein extension (35 Aa → 758 Aa) |
|                                     | 1847183  | T          | TGTTAAAATA | <i>splA</i> gene<br>Serine protease splA                             | Addition of 3 amino acids: Isoleucine, Lysine, Threonine                       |
|                                     | 1926867  | C          | A          | BppU family phage baseplate upper protein                            |                                                                                |
|                                     | 1928613  | A          | G          | Glucosaminidase domain-containing protein                            | Alanine → Threonine<br>Asparagine → Histidine                                  |
|                                     | 1928619  | AGCATT     | TGTATG     |                                                                      |                                                                                |
|                                     | 1928643  | TCTTGC     | CCTAGA     |                                                                      | Alanine → Serine                                                               |

|         |                         |                         |                                      |                                                         |
|---------|-------------------------|-------------------------|--------------------------------------|---------------------------------------------------------|
| 1928656 | T                       | C                       |                                      | Lysine → Arginine                                       |
| 1954480 | GC                      | AT                      | DUF3269 family protein               |                                                         |
| 1959882 | T                       | C                       | DUF1108 family protein               | Lysine → Arginine                                       |
| 2065350 | A                       | G                       | Putative HNHc nuclease               |                                                         |
| 2071676 | TT                      | CA                      |                                      | Phenylalanine → Serine                                  |
| 2071683 | A                       | G                       |                                      |                                                         |
| 2071689 | A                       | G                       |                                      |                                                         |
| 2071695 | CCGCCAAGAAAAC           | AAGACAAAGCAAT           |                                      | Glutamic Acid → Serine                                  |
| 2071713 | T                       | C                       |                                      |                                                         |
| 2071719 | TGCAAATGAACAA<br>TTGGAA | CGCGAATAGTCAGT<br>TAGAT |                                      | Glutamic Acid → Serine<br>Glutamic Acid → Aspartic Acid |
| 2071743 | G                       | A                       |                                      |                                                         |
| 2071766 | G                       | A                       |                                      | Glycine → Glutamic Acid                                 |
| 2071776 | G                       | A                       |                                      |                                                         |
| 2071782 | AC                      | GT                      | <i>lexA_4</i> gene<br>LexA repressor |                                                         |
| 2071788 | A                       | G                       |                                      |                                                         |
| 2071800 | A                       | G                       |                                      |                                                         |
| 2071806 | T                       | C                       |                                      |                                                         |
| 2071821 | CATA                    | TATC                    |                                      |                                                         |
| 2071836 | ATAT                    | GTAC                    |                                      |                                                         |
| 2071845 | C                       | T                       |                                      |                                                         |
| 2071851 | GCAT                    | ACAC                    |                                      |                                                         |
| 2071869 | T                       | C                       |                                      |                                                         |
| 2071878 | CGAAA                   | TGAAG                   |                                      | Threonine → Alanine                                     |
| 2071905 | T                       | C                       |                                      |                                                         |
| 2071912 | G                       | A                       |                                      | Valine → Isoleucine                                     |
| 2071917 | TGGT                    | CGGC                    |                                      |                                                         |
| 2071944 | A                       | G                       |                                      |                                                         |
| 2570775 | T                       | C                       | Intergenic region                    |                                                         |

**Figure S1. (A)** Unique phage genome representation using Phaster online software available on <http://phaster.ca/> with standard parameters. The phage genome size is > 140kb and composed on 217 proteins including 215 phage hit proteins with a majority of phage hypothetical proteins, with 30,53% CG %. Phage like proteins, fiber proteins, attachment site, and coat proteins are the most identified proteins by annotation. **(B)** Phage genome representation using Proksee (version 1.0). The phage SAVM05 genome was used as reference and compared with the other five genomes. The annotation of the phage genomes was performed using Pharokka and added directly on genome plots.

(A)

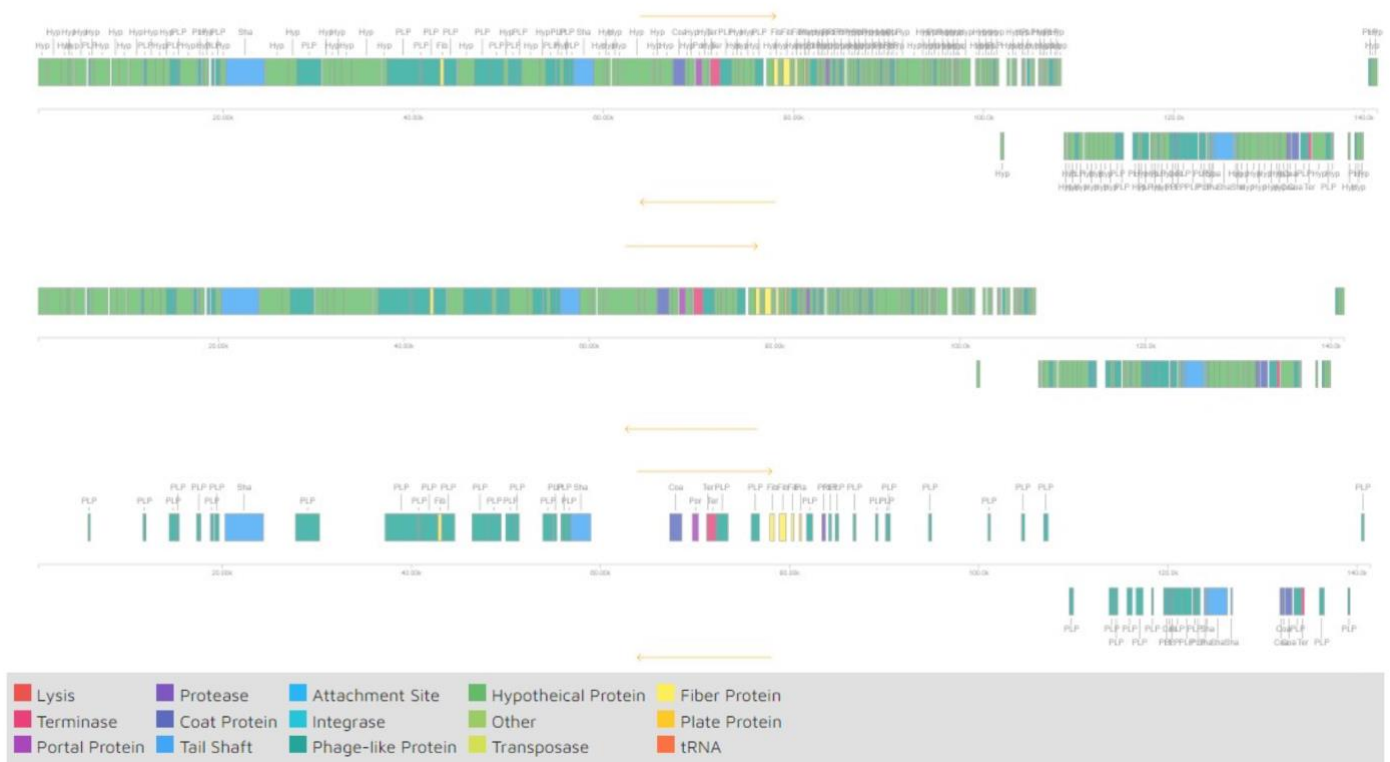

(B)

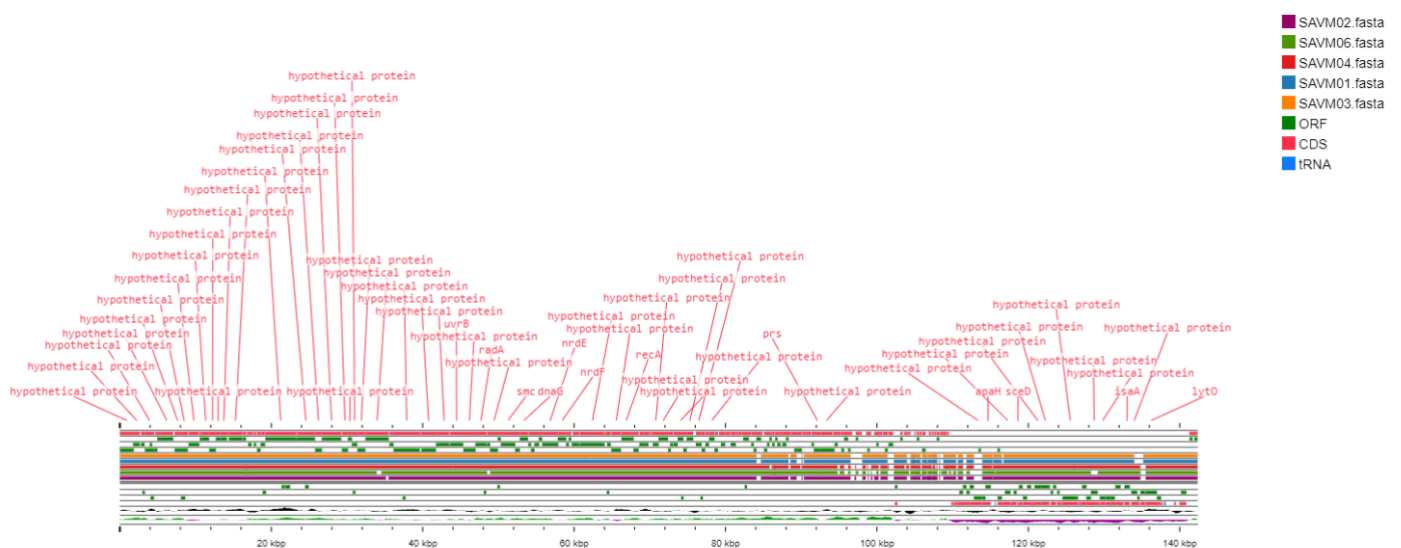

**Figure S2:** Pairwise genome alignment and phage genome identification. **(A)** Heatmap representing the pairwise genome alignment. **(B)** Phage genome identification using genome detective platform (Genome Detective.com).

(A)

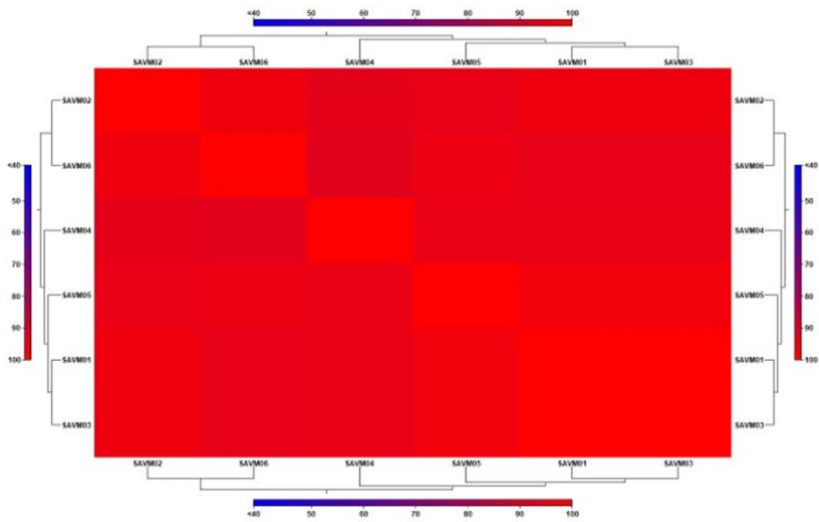

(B)

| Name   | Length | Report                 | Species                      | NT / AA Identity (%) |         | Genome |
|--------|--------|------------------------|------------------------------|----------------------|---------|--------|
| SAVM01 | 140578 | <a href="#">Report</a> | Kayvirus rod1                | 95.9622              | 96.8291 |        |
| SAVM02 | 141431 | <a href="#">Report</a> | Staphylococcus phage K       | 96.0514              | 96.6092 |        |
| SAVM03 | 140717 | <a href="#">Report</a> | Staphylococcus phage Staph1N | 95.1594              | 96.3217 |        |
| SAVM04 | 143250 | <a href="#">Report</a> | Staphylococcus phage G15     | 96.2907              | 97.8493 |        |
| SAVM05 | 142363 | <a href="#">Report</a> | Kayvirus rod1                | 94.5375              | 96.4286 |        |
| SAVM06 | 141167 | <a href="#">Report</a> | Staphylococcus phage 812     | 96.8384              | 97.5296 |        |

**Figure S3.** Lytic activity of the phage SAVM01 at various MOI. *S. aureus* NSA1385 was infected by SAVM01 phage at MOI of 10, 1, 0.1 and 0.01 ( $10^6$ - $10^9$  PFU/mL) or treated by SM buffer for the control, and cultured for 12 h at 37 °C and 108 rpm in 96-well plates using a microplate reader. At each time point, the data show the mean  $A_{600}$  readings  $\pm$  SD of three replicates.

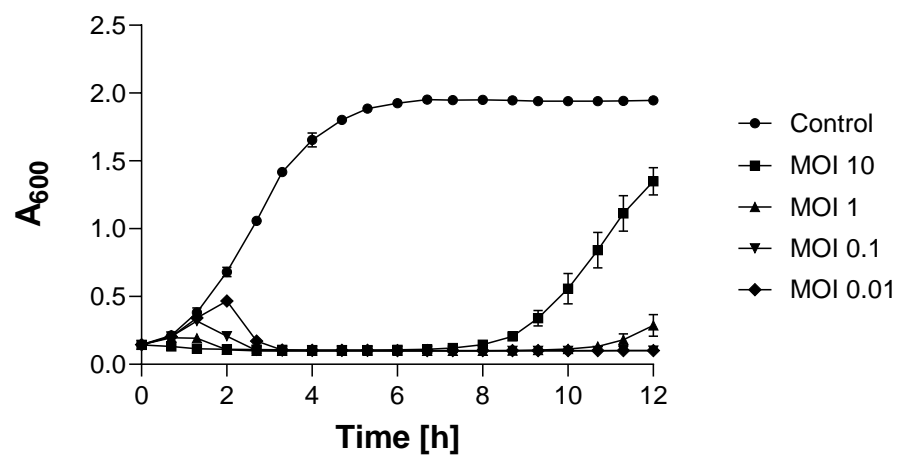

Supplement: s1 [file s1]
